# Supplementary material for: Comparison of Severity of Illness Scores and Artificial Intelligence Models That Are Predictive of Intensive Care Unit Mortality: Meta-analysis and Review of the Literature
Source: PubMed Central journal article supplement (PMC9198821; doi:10.2196/35293), 2022-05-31
Supplement: medinform_v10i5e35293_app2.pdf [file medinform_v10i5e35293_app2.pdf]

Multimedia appendix 2

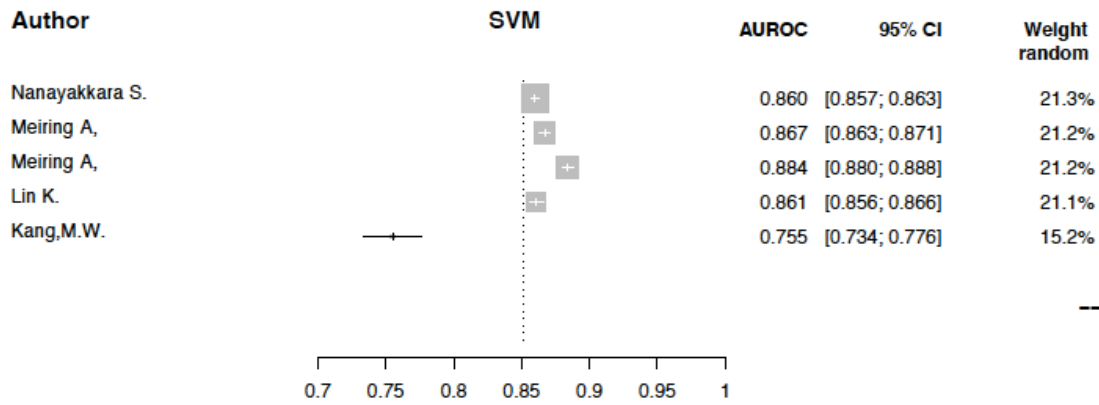

Figure 8. Support Vector Machine based models forest plot Heterogeneity:  $I^2=98\%$ ,  $\tau^2=0.0003$ ,  $P<.01$

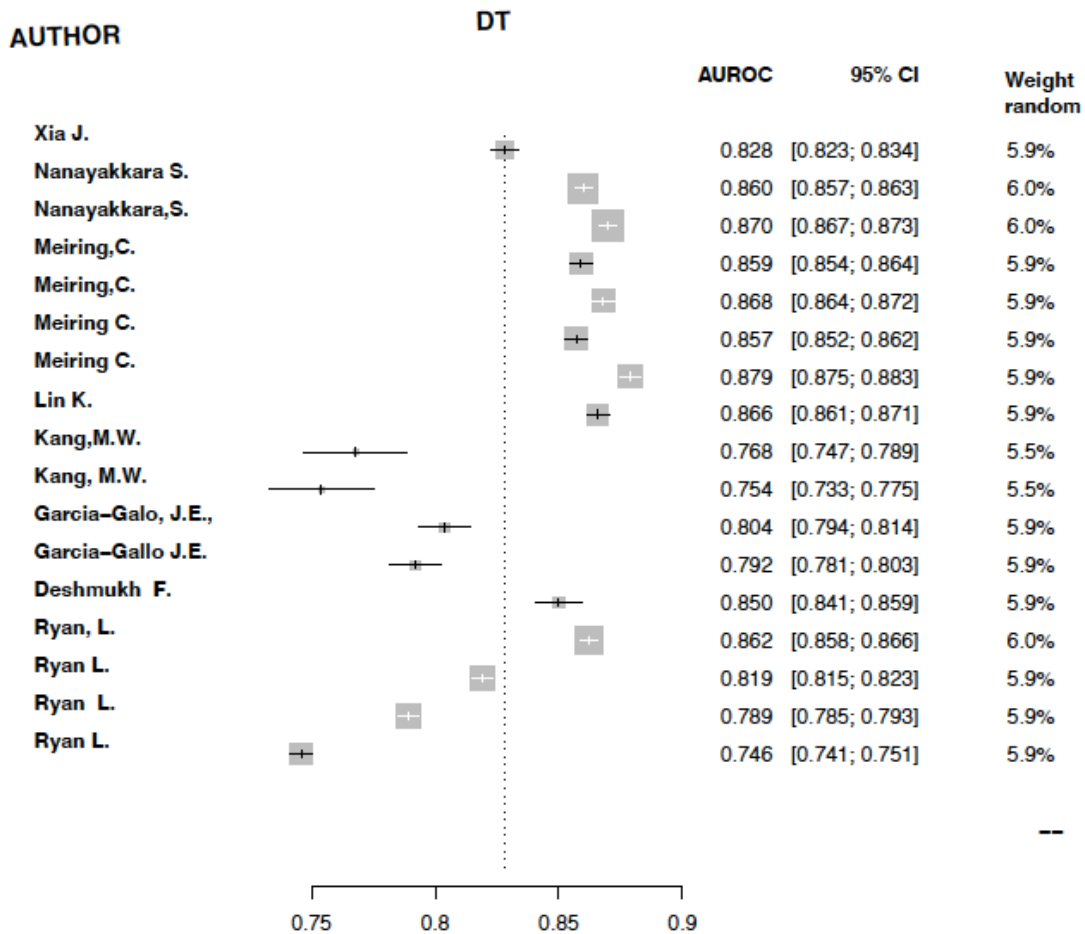

Figure 9. Decision Trees based models forest plot Heterogeneity:  $I^2=100\%$ ,  $\tau^2= 0.0015$ ,  $P=0$

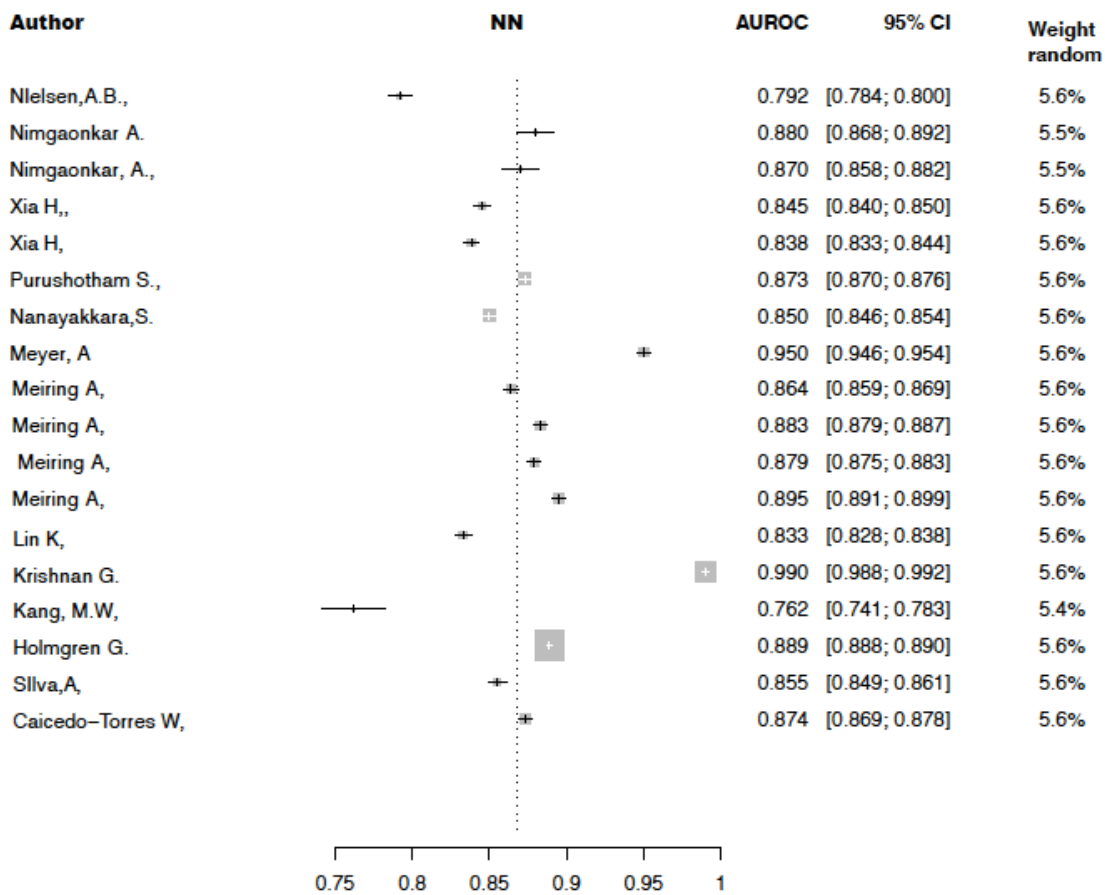

Figure 10. Neural Network based models forest plot Heterogeneity:  $I^2=100\%$ ,  $\tau^2=0.0029$ ,  $P=0$

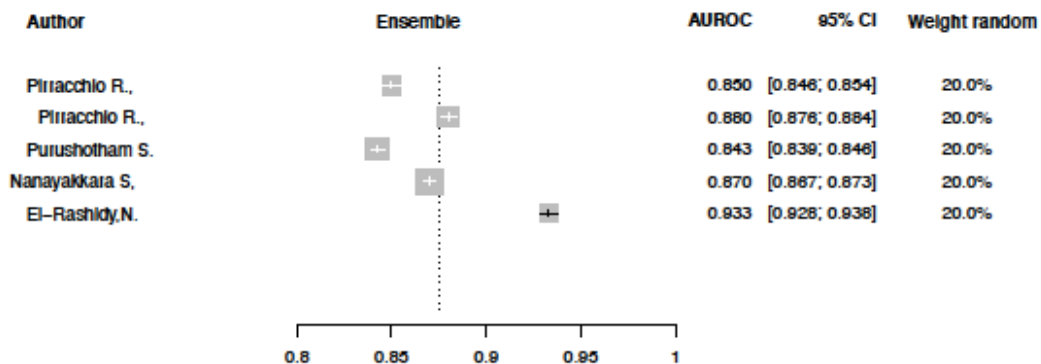

Figure 11. Ensemble based models forest plot Heterogeneity:  $I^2 =100\%$ ,  $\tau^2=0.0010$ ,  $P< .01$
